# Supplementary material for: Robust and promising hydrogen and oxygen evolution reactions by a nanostructured bifunctional FeCoPd alloy electrocatalyst
Source: Royal Society of Chemistry journal article supplement (doi:10.1039/d2ta04436f), 2022-01-01
Supplement: d2ta04436f1.pdf [file d2ta04436f1.pdf]

### **Electronic supplementary information (ESI)**

#### **Robust and promising hydrogen and oxygen evolution reaction by nanostructured bifunctional FeCoPd alloy electrocatalyst**

Ankur Kumar,<sup>a</sup> Siddhartha K. Purkayastha,<sup>b</sup> Ankur K. Guha,<sup>c</sup> Manash R. Das,<sup>d</sup> Sasanka Deka\*,<sup>a</sup>

<sup>a</sup>Department of Chemistry, University of Delhi, North Campus, Delhi-110007, India

<sup>b</sup>Department of Chemistry, Assam Don Bosco University, Sonapur 782402, India

<sup>c</sup>Advanced Computational Chemistry Centre, Cotton University, Panbazar, Guwahati, Assam, India-781001

<sup>d</sup>Materials Sciences and Technology Division, CSIR-North East Institute of Science and Technology, Jorhat 785006, Assam, India.

\*Email: [sdeka@chemistry.du.ac.in](mailto:sdeka@chemistry.du.ac.in)

#### **Additional control syntheses**

**Synthesis of FeCoPd-O (FCP-O) NPs.** The controlled synthesis of FeCoPd–O nanoparticles was carried out in the absence of hydrothermal treatment and without the addition of hydrazine hydrate while the rest procedure remains similar to the synthesis of FCP NPs.

**Synthesis of FeCoPd-H (FCP-H) NPs.** The controlled synthesis of FeCoPd-H nanoparticles was carried out in a similar manner as that of FCP nanoparticles but in the absence of hydrazine hydrate.

**Synthesis of FeCoPd-1.5 (FCP-1.5) and FeCoPd-3.0 (FCP-3.0) NPs.** The controlled synthesis of FeCoPd-1.5 and FeCoPd-3.0 nanoparticles were carried out in a similar manner as that of FCP nanoparticles, but with the addition of 1.5 mL and 3.0 mL of hydrazine hydrate instead of 4.5 mL as taken for FCP sample, respectively.

**Synthesis of FeCoPd-N (FCP-N) NPs.** The controlled synthesis of FeCoPd-N NPs (less Cl<sup>-</sup>) was carried out in a similar manner as that of FCP nanoparticles, but Fe(NO<sub>3</sub>)<sub>3</sub>·9H<sub>2</sub>O and Co(NO<sub>3</sub>)<sub>2</sub>·6H<sub>2</sub>O salts were used in place of chloride salts.

### **Synthesis of FeCoPd–0.5KCl (FCP-0.5KCl) and FeCoPd–1.0KCl (FCP-1.0KCl) samples.**

The synthesis of FeCoPd–0.5KCl and FeCoPd–1.0KCl (more Cl<sup>-</sup>) were carried out with the addition of 0.5 mmol and 1.0 mmol KCl solution in 7 mL of double distilled water followed by the addition of FeCl<sub>3</sub>.6H<sub>2</sub>O (0.5 mmol), PdCl<sub>2</sub> (0.5 mmol) and CoCl<sub>2</sub>.6H<sub>2</sub>O (0.5 mmol) before the addition of hydrazine hydrate, respectively. The remaining synthesis steps persist similar to that of FCP NPs route.

### **Chlorine estimation method**

(Mohr's titration method): [https://www.canterbury.ac.nz/media/documents/science-outreach/chloride\\_mohr.pdf](https://www.canterbury.ac.nz/media/documents/science-outreach/chloride_mohr.pdf)

Preparation of 500 ppm solution of different samples containing different content of chlorine (FCP, FCP-N, FCP-0.5KCl, and FCP-1.0KCl) in a 50 mL volumetric flask. To be estimated samples first digested in an acidic medium for the complete dissolution of solid particles. Preparation of 5000 ppm solution of silver nitrate in 100 mL of volumetric flask. The indicator used in the titration was potassium chromate solution (1g of K<sub>2</sub>CrO<sub>4</sub> in 20 mL of distilled water. Pipette out 10 mL of 500 ppm solution of different content of chlorine sample in 30 mL vial with the addition of 1 mL K<sub>2</sub>CrO<sub>4</sub> indicator. The resultant solution was then titrated with silver nitrate solution from the burette dropwise until the color changed from cloudy faint lemon-yellow to red-brown. The estimated amount of chlorine is determined from the volume of silver nitrate used from the burette.

**Instrumentation:** Talos Thermo Scientific transmission electron microscope employed at accelerating voltage of 200 kV utilized for capturing transmission electron microscopy (TEM) and phase-contrast high-resolution TEM (HRTEM) images. X-ray diffraction (XRD) patterns were used to investigate the purity and crystalline phase on a Rigaku ULTIMA IV X-ray diffractometer by using Cu K $\alpha$  radiation ( $\lambda = 1.54056 \text{ \AA}$ ) source. Field-Emission scanning electron microscope (FESEM, JEOL JSM 6610, 20 kV) paired with Energy dispersive X-ray spectrometer has been used to examine the three-dimensional morphology and elemental

composition of the synthesized alloy samples. SEM and EDAX estimations were obtained with a JOEL JSM 6610 instrument at 20 kV, with a spot size of 35 and a width of 10 mm. X-ray Photoelectron Spectroscopy (XPS) measurements were performed on a Thermo-Scientific ESCALAB Xi+ spectrometer with a monochromatic Al K $\alpha$  X-ray source (1486.6 eV) containing a spherical energy analyzer that operates in the constant analyzer energy (CAE) mode using the electromagnetic lens mode. The Nova Touch LX2 gas sorption analyzer from Quantachrome Instruments was used for analyzing BET surface area and pore size analyses. Elemental percentages were analysed in Agilent ICP-MS 7900 Inductively Coupled Plasma Mass Spectrometry (ICP-MS). Computational calculations were performed using Gaussian16 suite of program.<sup>1</sup>

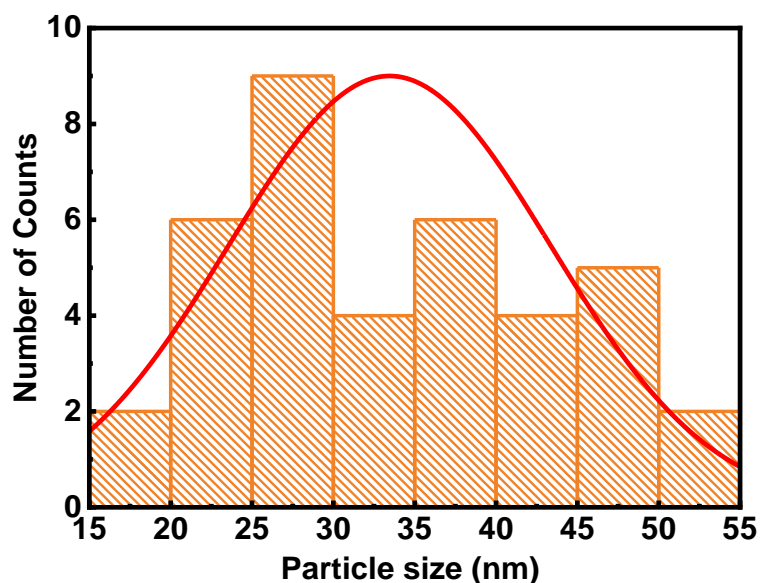

**Fig. S1.** Particle size distribution histograms of FCP polyhedral nanoparticles.

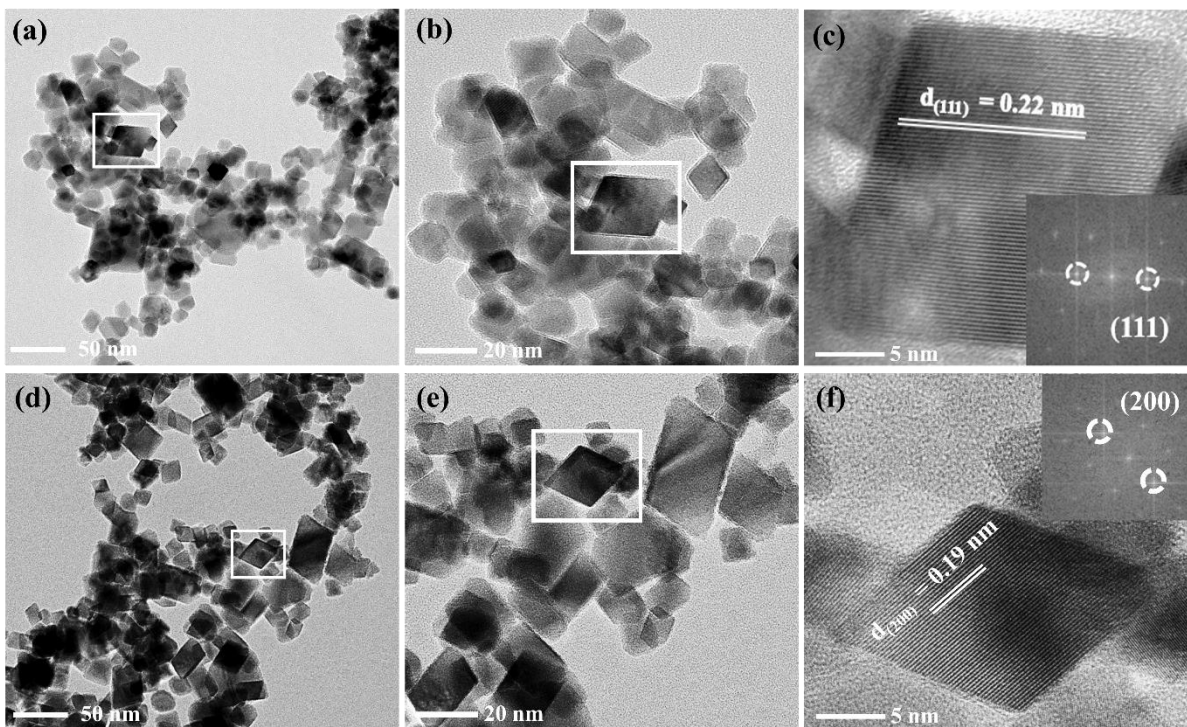

**Fig. S2.** (a,b and d,e) Low-and High-resolution TEM images of as-synthesized trimetallic FeCoPd nanoparticles respectively. (c and f) HRTEM image of FeCoPd polyhedral nanoparticles with (111) and (200) planes respectively. Inset: corresponding calculated 2D-FFT pattern.

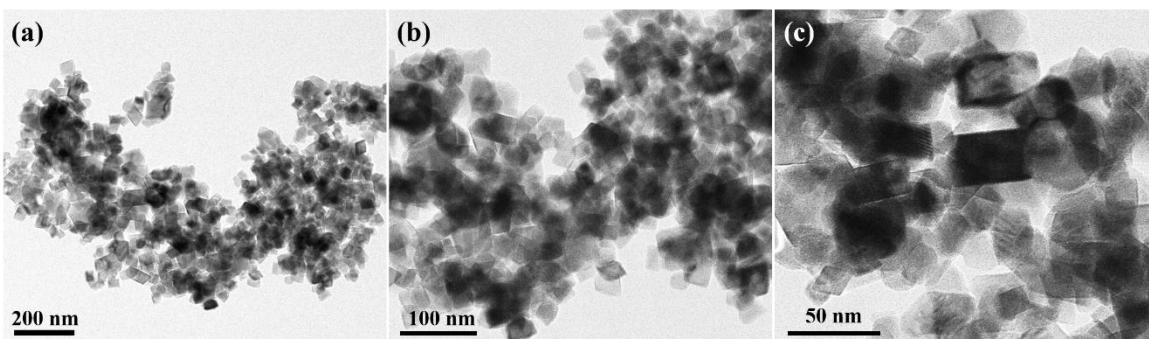

**Fig. S3.** (a-c) TEM images of the FCP-N sample prepared from nitrate salt of Fe and Co.

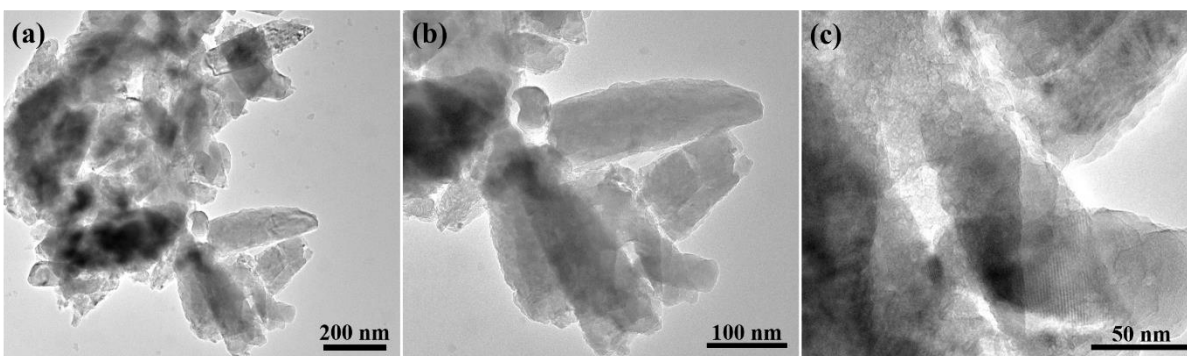

**Fig. S4.** (a-c) TEM images of the FCP-0.5KCl sample.

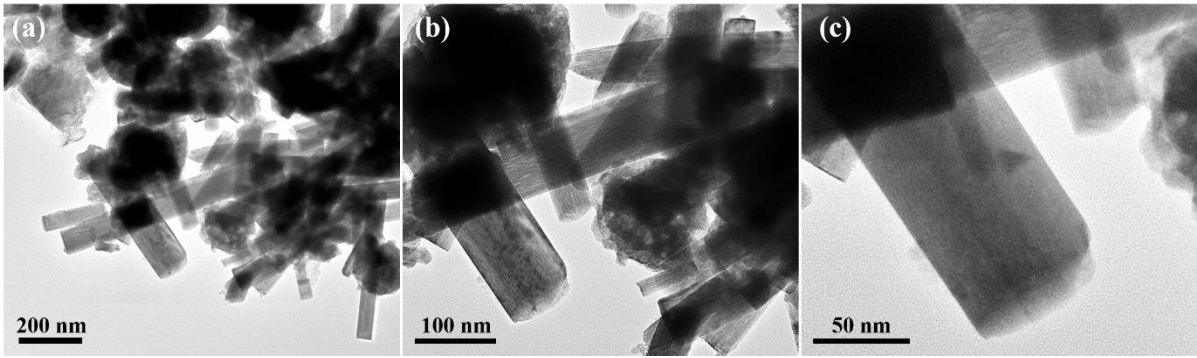

**Fig. S5.** (a-c) TEM images of the FCP-1.0KCl sample.

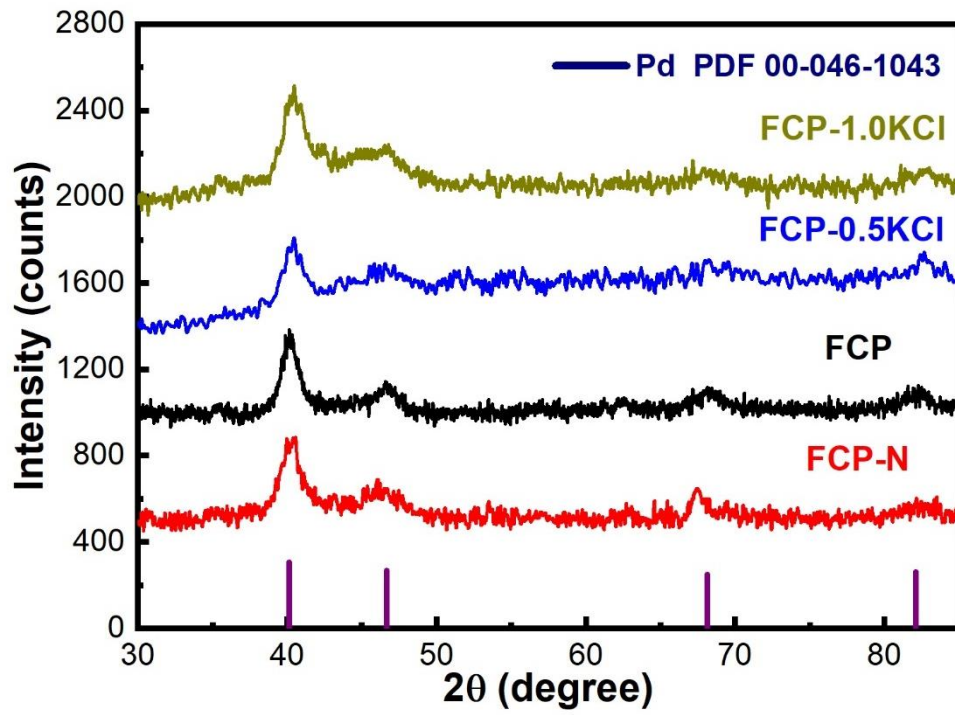

**Fig. S6.** X-ray diffraction patterns of the different amount of chlorine sample in FCP sample.

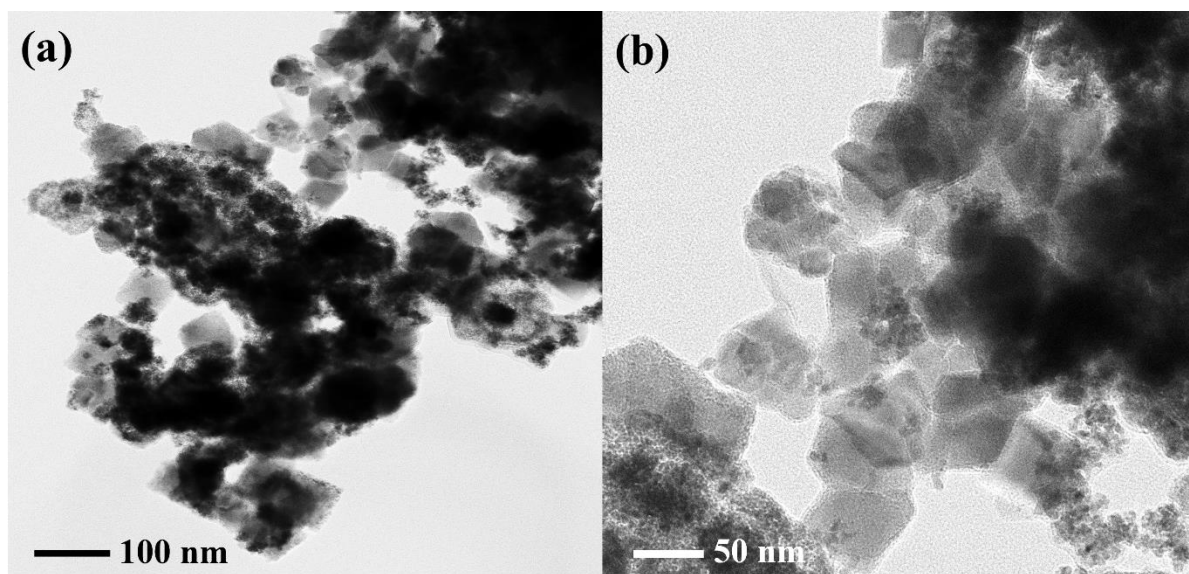

**Fig. S7.** (a) Low and (b) High-resolution TEM image of FeCoPd at 120° C.

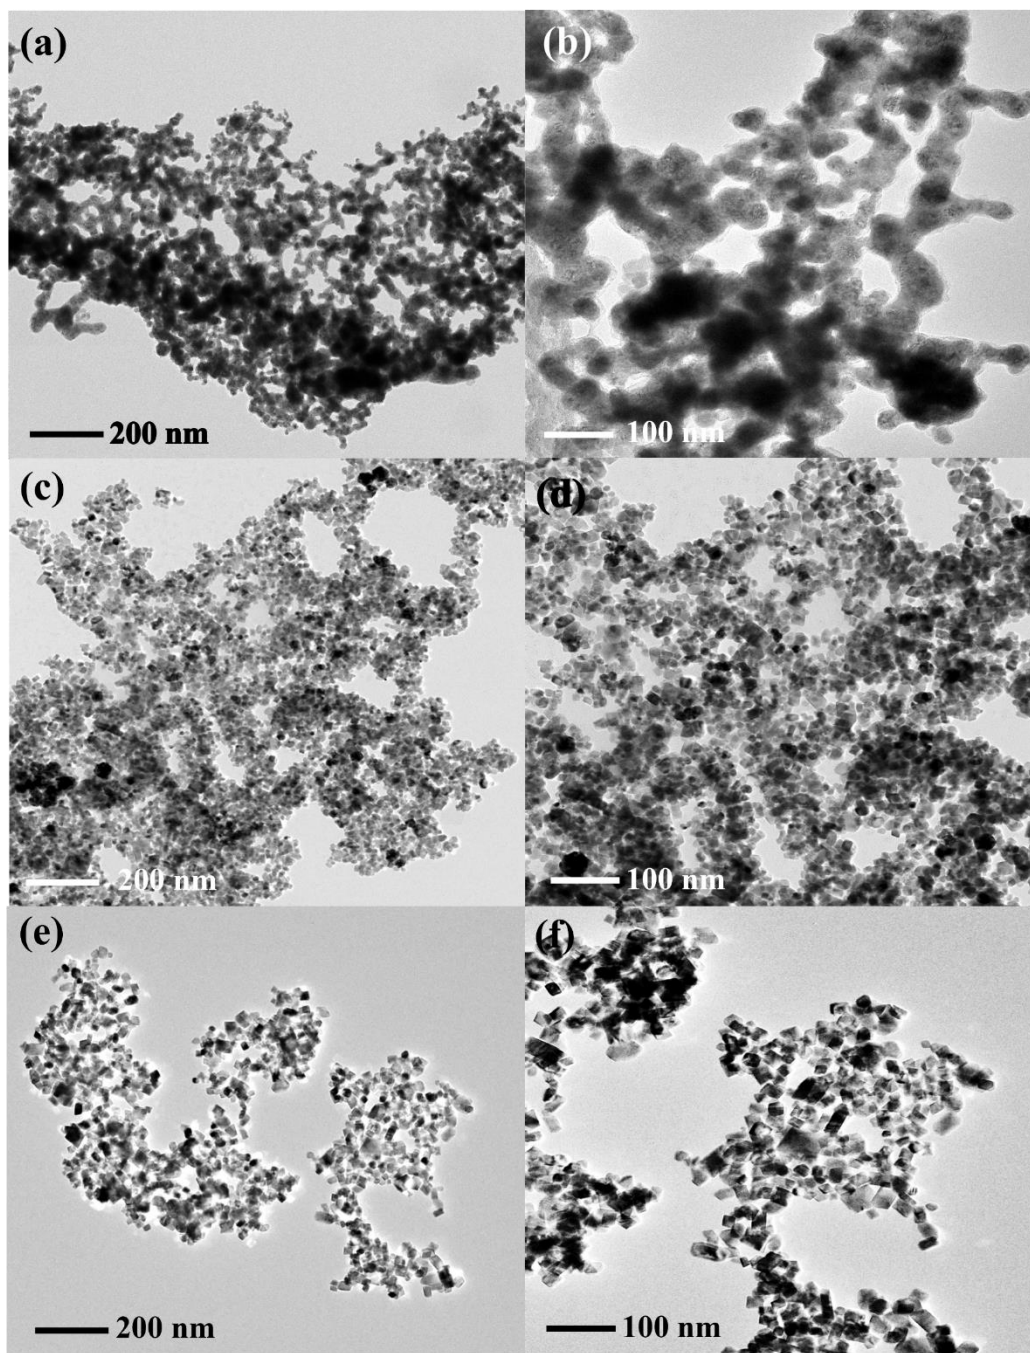

**Fig. S8.** Low-resolution TEM images of (a,b) CoPd, (c,d) FePd, and (e,f) FeCo NPs.

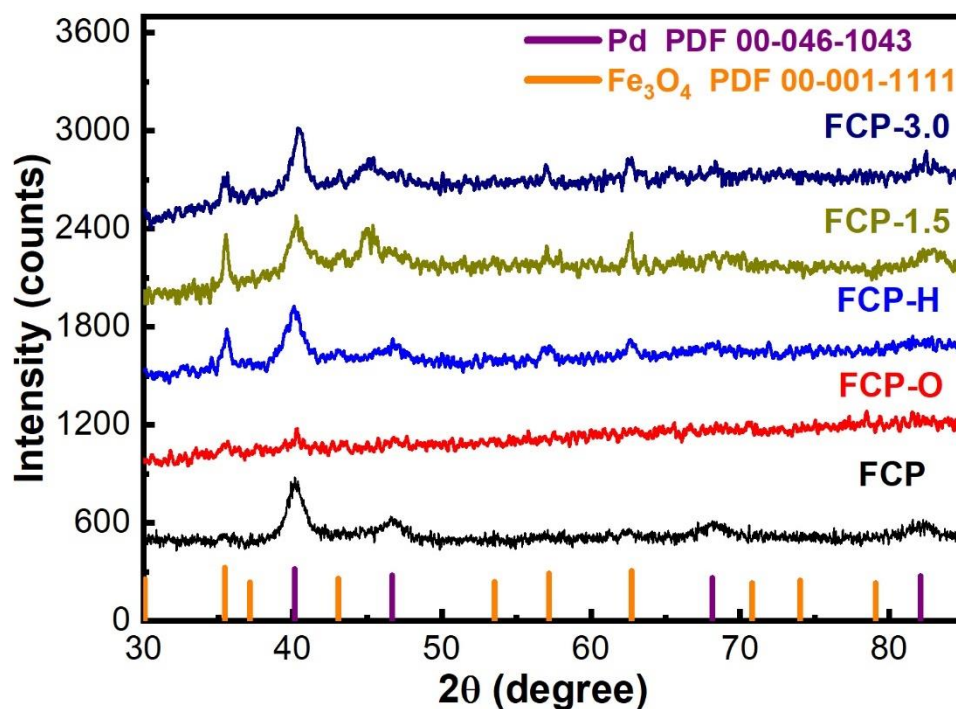

**Fig. S9.** Powder X-ray diffraction patterns of the controlled study of FCP sample

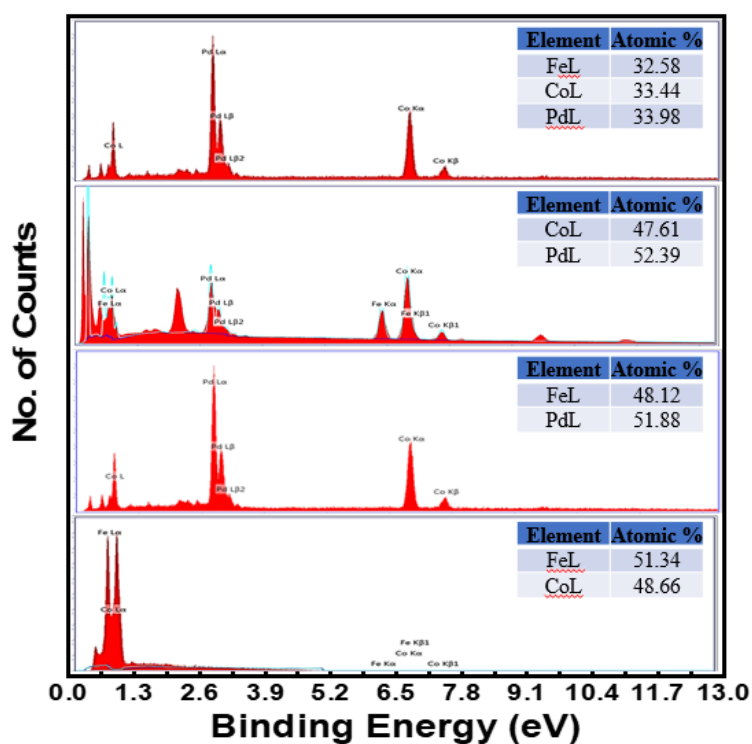

**Fig. S10.** SEM-EDAX survey of FCP, CP, FP, and FC samples with corresponding elemental composition.



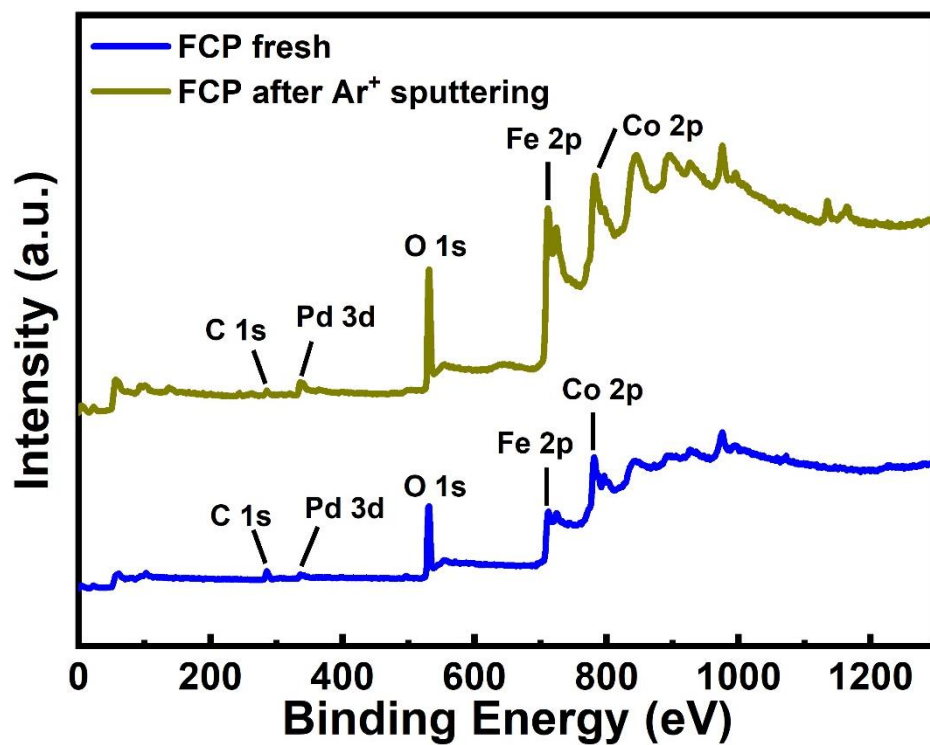

**Fig. S11.** Wide scan XPS spectrum of FCP fresh sample and after Ar<sup>+</sup> sputtering for 120s.

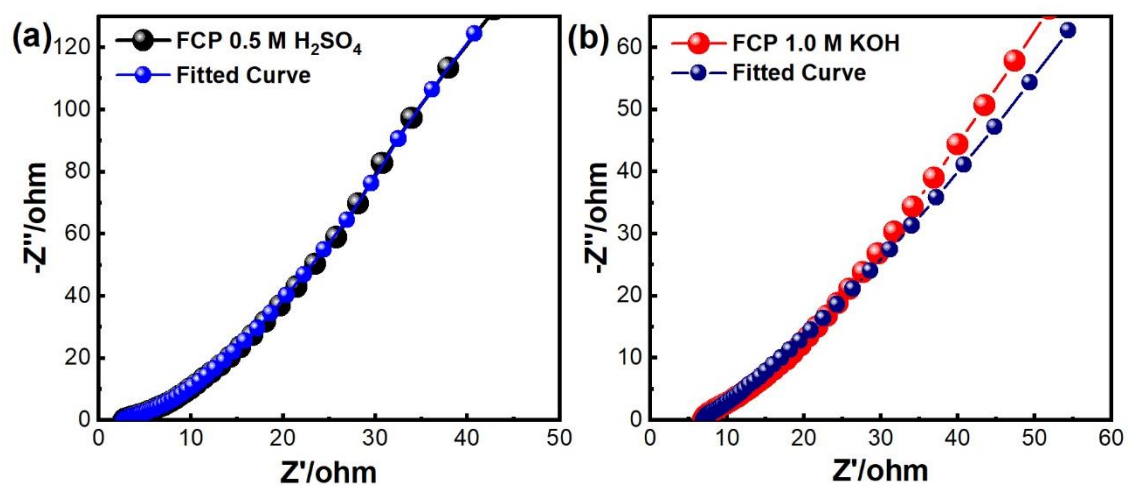

**Fig. S12.** Fitted curve obtained from Nyquist plot in (a) acidic and (b) alkaline electrolyte.

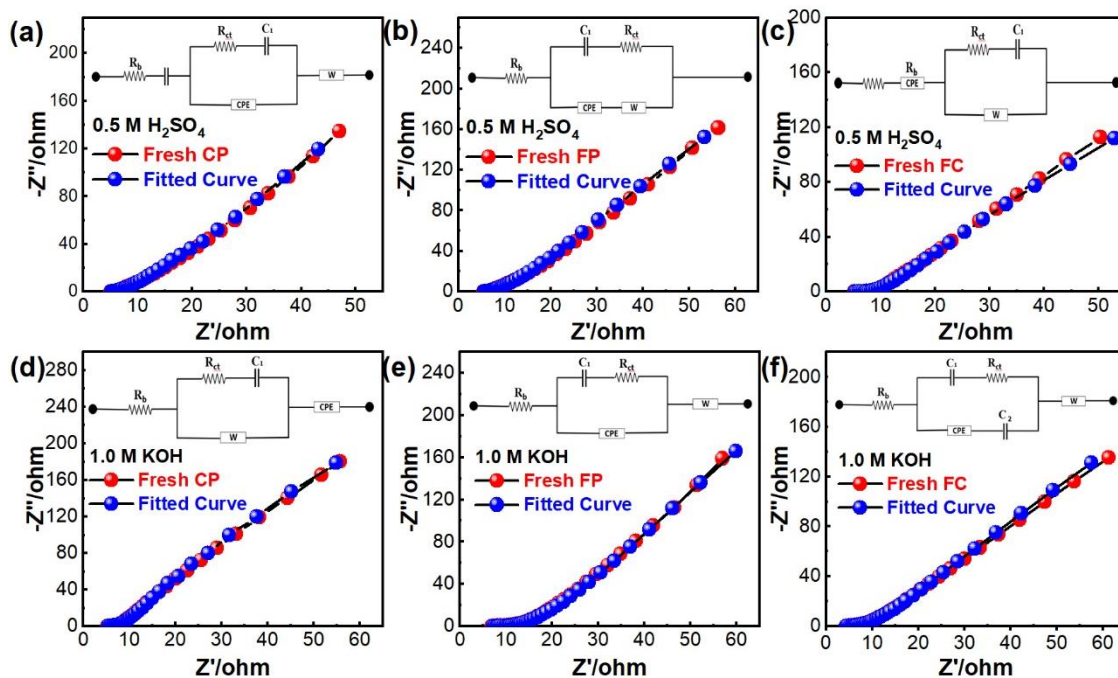

**Fig. S13.** Fresh and fitted curve obtained from Nyquist plot with circuit diagram corresponding to (a and d) CP, (b and e) FP, and (c and f) FP in acidic and alkaline medium respectively.

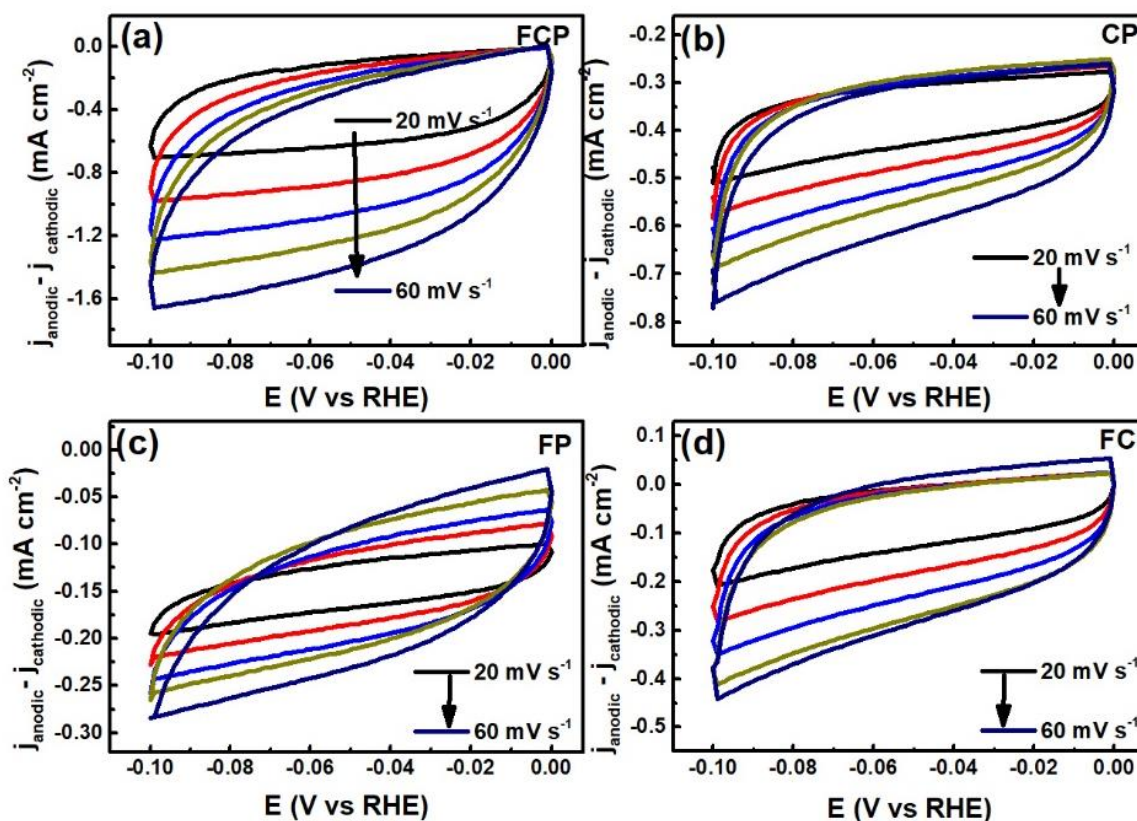

**Fig. S14.** CV curves at different scan rates in non-faradaic potential region in 0.5 M  $\text{H}_2\text{SO}_4$  for (a) FCP, (b) CP, (c) FP and (d) FC samples.

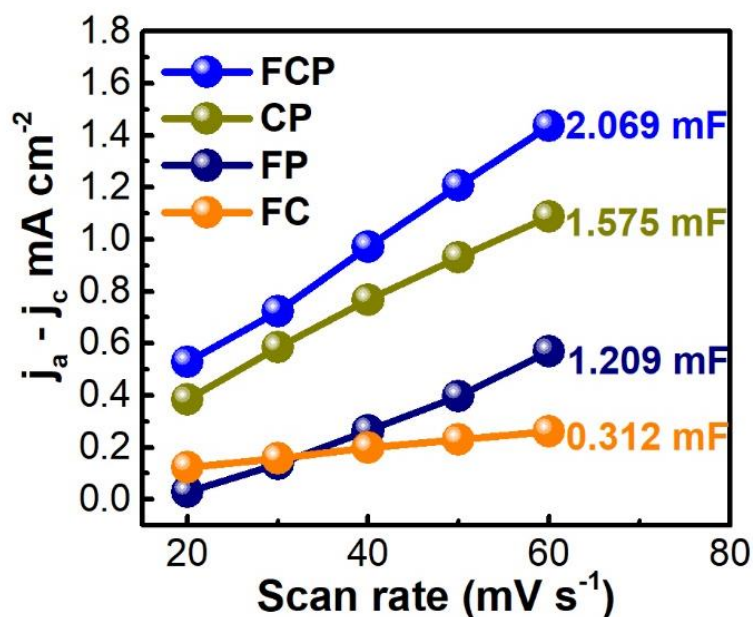

**Fig. S15.** Current ( $\Delta j$ ) vs. scan rate plot in 0.5 M H<sub>2</sub>SO<sub>4</sub> electrolyte.

## Calculations:

### 1. Exchange current density:

$$\text{Exchange current density } (i_{\text{ex}}) = RT/nF\Theta A$$

Where R is the universal gas constant (8.314 J K<sup>-1</sup> mol<sup>-1</sup>), T is the reaction temperature (298 K), n is the number of electrons, F is the Faraday constant (96485 C mol<sup>-1</sup>),  $\Theta$  is the charge transfer resistance calculated from EIS equivalent circuit diagram (for FCP  $\Theta$  is 0.97  $\Omega$ ), and A is the area of the graphite sheet electrode (0.09 cm<sup>2</sup>).<sup>2</sup>

(a) In 0.5 M H<sub>2</sub>SO<sub>4</sub>

$$\begin{aligned} &= \frac{8.314 \text{ J K}^{-1} \text{ mol}^{-1} * 298\text{K}}{2 * 96485 \text{ C mol}^{-1} * 0.97 \Omega * 0.09 \text{ cm}^2} \\ &= 147.07 \text{ mA cm}^{-2} \end{aligned}$$

(b) In 1 M KOH

$$\begin{aligned} &= \frac{8.314 \text{ J K}^{-1} \text{ mol}^{-1} * 298\text{K}}{4 * 96485 \text{ C mol}^{-1} * 1.55 \Omega * 0.09 \text{ cm}^2} \\ &= 46.02 \text{ mA cm}^{-2} \end{aligned}$$

## 2. Mass activity:<sup>3</sup>

$$\text{Mass activity (A/g)} = j/m$$

Where  $j$  is the current density ( $\text{mA cm}^{-2}$ ) and  $m$  is mass loading onto graphite sheet working electrode ( $\text{mg cm}^{-2}$ )

$$\begin{aligned} &= \frac{10 \text{ mA cm}^2}{2.14 \text{ mg cm}^{-2}} \\ &= 4.67 \text{ A g}^{-1} \end{aligned}$$

## 3. Turn over frequency (TOF) calculation:<sup>4,5</sup>

$$\text{Turn over frequency (TOF)} = \frac{j \times A}{n \times F \times N_s}$$

Where  $j$  is the current density ( $\text{mA cm}^{-2}$ ),  $A$  is the area of the electrode ( $\text{cm}^2$ ),  $F$  is the Faraday constant ( $96,485 \text{ C mol}^{-1}$ ) and  $N_s$  is the concentration of active sites in the catalysts ( $\text{mol cm}^{-2}$ ). To calculate  $N_s$ , cyclic voltammetry (CV) was performed for in non-Faradaic region at different scan rates in  $0.5 \text{ M H}_2\text{SO}_4$  and  $1.0 \text{ M KOH}$  electrolytes. The peak currents were plotted versus scan rates where the slope is equal to

$$\text{Slope} = \frac{F^2 A N_s}{nRT}$$

$$N_s = 1.101 \times 10^{-9} \text{ mol (0.5 M H}_2\text{SO}_4)$$

$$N_s = 4.160 \times 10^{-9} \text{ mol (1.0 M KOH)}$$

where  $n$  is the number of electrons transferred,  $F$  presents the Faradic constant,  $A$  is the surface area of the electrode,  $N_s$  is the surface concentration of active sites (mol),  $R$  and  $T$  is the ideal gas constant and the absolute temperature, respectively.

$$\begin{aligned} \text{TOF (0.5 M H}_2\text{SO}_4) &= \frac{10 \text{ mA cm}^{-2} \times 0.09 \text{ cm}^2}{2 \times 96,485 \text{ C mol}^{-1} \times 1.101 \times 10^{-9} \text{ mol}} \\ &= 4.23 \text{ s}^{-1} \end{aligned}$$

$$\begin{aligned} \text{TOF (1.0 M KOH)} &= \frac{10 \text{ mA cm}^{-2} \times 0.09 \text{ cm}^2}{4 \times 96,485 \text{ C mol}^{-1} \times 4.160 \times 10^{-9} \text{ mol}} \\ &= 0.56 \text{ s}^{-1} \end{aligned}$$

#### 4. Electrochemical active surface area (ECSA):

The Electrochemical active surface area was calculated from double-layer capacitance of modified catalyst electrode in 1.0 M KOH.<sup>6</sup> The slope of curve  $\Delta J$  ( $J_{\text{anodic}} - J_{\text{cathodic}} / \text{mA cm}^{-2}$ ) versus Scan rate ( $\text{mV s}^{-1}$ ) give the value of  $2C_{\text{dl}}$ .<sup>4</sup>

$$\text{ECSA} = C_{\text{dl}}/C_s$$

Where  $C_{\text{dl}}$  is the measured double layer capacitance and  $C_s$  is the specific capacitance of the catalyst ( $0.04 \text{ mF cm}^{-2}$  in 1.0 M KOH)

$$\begin{aligned} &= \frac{1.954 \text{ mF}}{0.04 \text{ mF cm}^{-2}} (1.0 \text{ M KOH}) \\ &= 48.85 \text{ cm}^2 \end{aligned}$$

#### 5. Theoretically calculated amount of oxygen

The theoretical amount of expected total gas volume was evaluated using Faraday's law of electrolysis with the ideal gas law:<sup>7</sup>

$$V_{\text{theo}} = \frac{RT}{F p z} Q$$

Here,  $R$  is the ideal gas constant,  $T$  is the absolute temperature,  $Q$  is the charge (at an applied current density of  $50 \text{ mA cm}^{-2}$  for 60 minutes),  $F$  is Faraday's constant,  $p$  is the pressure and  $z = 4$  is the number of electrons involved.

**Table S1.** Summary of overpotential (mV) and Tafel slope ( $\text{mV dec}^{-1}$ ) of the studied catalysts.

| Sr. No. | Catalysts (code) | Overpotential (mV)                   |               | Tafel slope ( $\text{mV dec}^{-1}$ ) |               |
|---------|------------------|--------------------------------------|---------------|--------------------------------------|---------------|
|         |                  | HER (0.5 M $\text{H}_2\text{SO}_4$ ) | OER (1 M KOH) | HER (0.5 M $\text{H}_2\text{SO}_4$ ) | OER (1 M KOH) |
| 1.      | IrO <sub>2</sub> | -                                    | 295           | -                                    | 92            |
| 2.      | Pt/C             | 36                                   | -             | 35                                   | -             |
| 3.      | FCP/GS           | 52                                   | 197           | 38                                   | 47            |
| 4.      | CP/GS            | 79                                   | 290           | 55                                   | 88            |
| 5.      | FP/GS            | 85                                   | 328           | 71                                   | 130           |
| 6.      | FC/GS            | 213                                  | 270           | 125                                  | 84            |

**Table S2.** Comparison of the electrocatalytic HER activity of the present FeCoPd with other reported electrocatalysts in acidic electrolyte.

| Sr. No. | Catalysts                                            | Substrate | Over potential (mV) at 10 mA cm <sup>-2</sup> | Tafel Slope (mV dec <sup>-1</sup> ) | Durability (h) | Reference                                       |
|---------|------------------------------------------------------|-----------|-----------------------------------------------|-------------------------------------|----------------|-------------------------------------------------|
| 1       | FCP (FeCoPd)                                         | GS        | 52                                            | 38                                  | 66             | This Work                                       |
| 2       | Ir <sub>25</sub> Ni <sub>33</sub> Ta                 | Si        | 99                                            | 35                                  | 10             | Adv. Mater.2019, 1906384                        |
| 3       | Pd <sub>50</sub> Ag <sub>50</sub>                    | NF        | 97                                            | 75.5                                | 20000 seconds  | Int. J. Electrochem. Sci., 2019, 14, 8781-8792  |
| 4       | PdCu@Pd NCs                                          | GC        | 65                                            | 35                                  | -              | ACS Appl. Mater. Interfaces, 2017, 9, 8151-8160 |
| 5       | Ni/WC@NC                                             | GC        | 53                                            | 43.5                                | 24             | Energy Environ. Sci., 2018, 11, 2114-2123       |
| 6       | RuNi/CQ Ds-600                                       | GC        | 58                                            | 55                                  | 100            | Angew. Chem. Int. Ed., 2019, 59, 1718-1726      |
| 7       | Ni <sub>0.8</sub> Fe <sub>0.2</sub> S e <sub>2</sub> | GC        | 64                                            | 43                                  | 4500 sec       | Nano Res., 2018, 11, 6051-6061                  |

|    |                                           |     |     |      |              |                                                    |
|----|-------------------------------------------|-----|-----|------|--------------|----------------------------------------------------|
| 8  | Pd-CN <sub>x</sub>                        | GC  | 55  | 35   | 100          | ACS Catal., 2016, 6, 1929-1941                     |
| 9  | Ni <sub>3</sub> Cu <sub>1</sub> NG<br>-NC | GC  | 95  | 77.1 | -            | Small, 2019, 15, 1901545                           |
| 10 | Co <sub>9</sub> S <sub>8</sub>            | GC  | 71  | 42.4 | 10           | J. Colloid Interface sci., 558(2020) 155-162       |
| 11 | VGN@Pd<br>0.2-MoS <sub>2</sub>            | CFP | 106 | 60   | 1100         | J. Power Sources 456 (2020) 227998                 |
| 12 | CoP/NiCo<br>P                             | GC  | 60  | 64   | 80           | Adv. Func. Mater., 2018, 29, 1807976               |
| 13 | MoP/MoS <sub>2</sub>                      | CC  | 69  | 61   | 24           | ACS Appl. Mater. Interfaces, 2019, 11, 25986-25995 |
| 14 | CuPdPt/C                                  | GC  | 55  | 25   | 8000 seconds | J. Mater. Chem. A, 2016, 4, 15309-15315            |
| 15 | PtCu/CNF<br>s                             | CNF | 71  | 68   | 10           | Adv. Mater. Interfaces 2017 1700005                |

|    |             |    |    |    |                  |                                                           |
|----|-------------|----|----|----|------------------|-----------------------------------------------------------|
| 16 | PdCo@C<br>N | GC | 80 | 31 | 40000<br>seconds | ACS<br>Appl.<br>Mater.<br>Interfaces<br>2016, 8,<br>13378 |
|----|-------------|----|----|----|------------------|-----------------------------------------------------------|

**Table S3.** Summary of Charge transfer resistance and Exchange current density of the studied catalysts.

| Sr. No. | Catalysts<br>(code) | Charge transfer resistance<br>( $R_{ct}$ , ohm) |         | Exchange current density<br>( $i_{ex}/\text{mA cm}^{-2}$ ) |         |
|---------|---------------------|-------------------------------------------------|---------|------------------------------------------------------------|---------|
|         |                     | 0.5 M H <sub>2</sub> SO <sub>4</sub>            | 1 M KOH | 0.5 M H <sub>2</sub> SO <sub>4</sub>                       | 1 M KOH |
| 1.      | FCP/GS              | 0.97                                            | 1.55    | 147.07                                                     | 46.02   |
| 2.      | CP/GS               | 1.69                                            | 3.37    | 84.41                                                      | 21.16   |
| 3.      | FP/GS               | 1.99                                            | 6.53    | 71.69                                                      | 10.92   |
| 4.      | FC/GS               | 3.67                                            | 2.69    | 38.87                                                      | 26.52   |

**Table S4.** Summary of TOF ( $\text{s}^{-1}$ ) and ECSA ( $\text{cm}^2$ ) of the studied catalysts.

| Sr. No. | Catalysts<br>(code) | TOF ( $\text{s}^{-1}$ )              |         | ECSA ( $\text{cm}^2$ ) |
|---------|---------------------|--------------------------------------|---------|------------------------|
|         |                     | 0.5 M H <sub>2</sub> SO <sub>4</sub> | 1 M KOH | 1 M KOH                |
| 1.      | FCP/GS              | 4.23                                 | 0.56    | 48.85                  |
| 2.      | CP/GS               | 2.7                                  | 0.51    | 16.15                  |
| 3.      | FP/GS               | 2.51                                 | 0.44    | 6.65                   |
| 4.      | FC/GS               | 1.57                                 | 0.52    | 43.62                  |



**Table S5.** Comparison of the electrocatalytic OER activity of the present FeCoPd with other reported electrocatalysts in alkaline electrolyte.

| Sr. No. | Catalysts                              | Substrate | Over potential (mV) at 10 mA cm <sup>-2</sup> | Tafel Slope (mV dec <sup>-1</sup> ) | Durability (h) | Reference                                     |
|---------|----------------------------------------|-----------|-----------------------------------------------|-------------------------------------|----------------|-----------------------------------------------|
| 1       | FCP (FeCoPd)                           | GS        | 197                                           | 47                                  | 100            | This Work                                     |
| 2       | Ni <sub>2.5</sub> Co <sub>0.5</sub> Fe | NF        | 275                                           | 105                                 | -              | J. Mater. Chem. A, 2016, 4, 7245-7250         |
| 3       | NiFeMo                                 | NF        | 238                                           | 60                                  | 50             | ACS Energy lett. 2018,3,546-554               |
| 4       | FeCoNi                                 | GC        | 288                                           | -                                   | 10             | ACS Catal. 2017, 7, 469-479                   |
| 5       | Ir <sub>44</sub> Pd <sub>10</sub>      | GC        | 226                                           | 53.9                                | 15             | Angew. Chem. Int. Ed., 2019, 58, 7244-7248    |
| 6       | Y-S Ni-Co-Se                           | CFP       | 300                                           | 72                                  | 18             | ACS Sustain. Chem. Eng. 2018, 6, 10952-10959  |
| 7       | Ru <sub>1</sub> Co <sub>2</sub>        | CC        | 240                                           | 54.4                                | 10             | ACS Appl. Energy Mater. 2020, 3, 2, 1869-1874 |

|    |                                    |     |                 |      |           |                                               |
|----|------------------------------------|-----|-----------------|------|-----------|-----------------------------------------------|
| 8  | Fe <sub>2</sub> Co-MOF             | GC  | 339             | 36.2 | -         | Inorg. Chem. 2020, 59, 9, 6078–6086           |
| 9  | NiRuO <sub>x</sub> @C              | RDE | 252             | 62   | 12        | Chem. Eng. J., 2021, 426, 130762.             |
| 10 | RuCo@C Ds                          | GC  | 257             | 96.1 | 20        | J. Mater. Chem. A, 2020,8, 9638-9645          |
| 11 | Ir <sub>0.5</sub> W <sub>0.5</sub> | GC  | 281 (0.1 M KOH) | 52   | 30000 sec | Nanoscale, 2019,11, 8898-8905                 |
| 12 | RuNi NAs                           | GC  | 304             | 73.4 | 10        | iScience, 2019, 11, 492-504                   |
| 13 | RuTe <sub>2</sub> PNRs             | GC  | 285             | 62   | -         | Nat. Commun., 2019, 10                        |
| 14 | NiCo-UMOFNs                        | GC  | 250             | 42   | -         | J. Mater. Chem. A, 2018, 6, 22070-22076       |
| 15 | Li-IrSe <sub>2</sub>               | GC  | 270             | -    | 10        | Angew. Chem. Int. Ed. Engl. 2019 14764-14769. |
| 16 | RuIrO <sub>x</sub>                 | CFP | 250             | 50   | -         | Nature Communications 2019, 10, 4875          |

|    |                                                |     |       |      |    |                                            |
|----|------------------------------------------------|-----|-------|------|----|--------------------------------------------|
| 17 | Ni <sub>0.93</sub> Ir <sub>0.07</sub> /<br>rGO | CFP | 271.8 | 55.9 | 13 | J. Energy<br>Chem.<br>2020, 49,<br>166-173 |
|----|------------------------------------------------|-----|-------|------|----|--------------------------------------------|

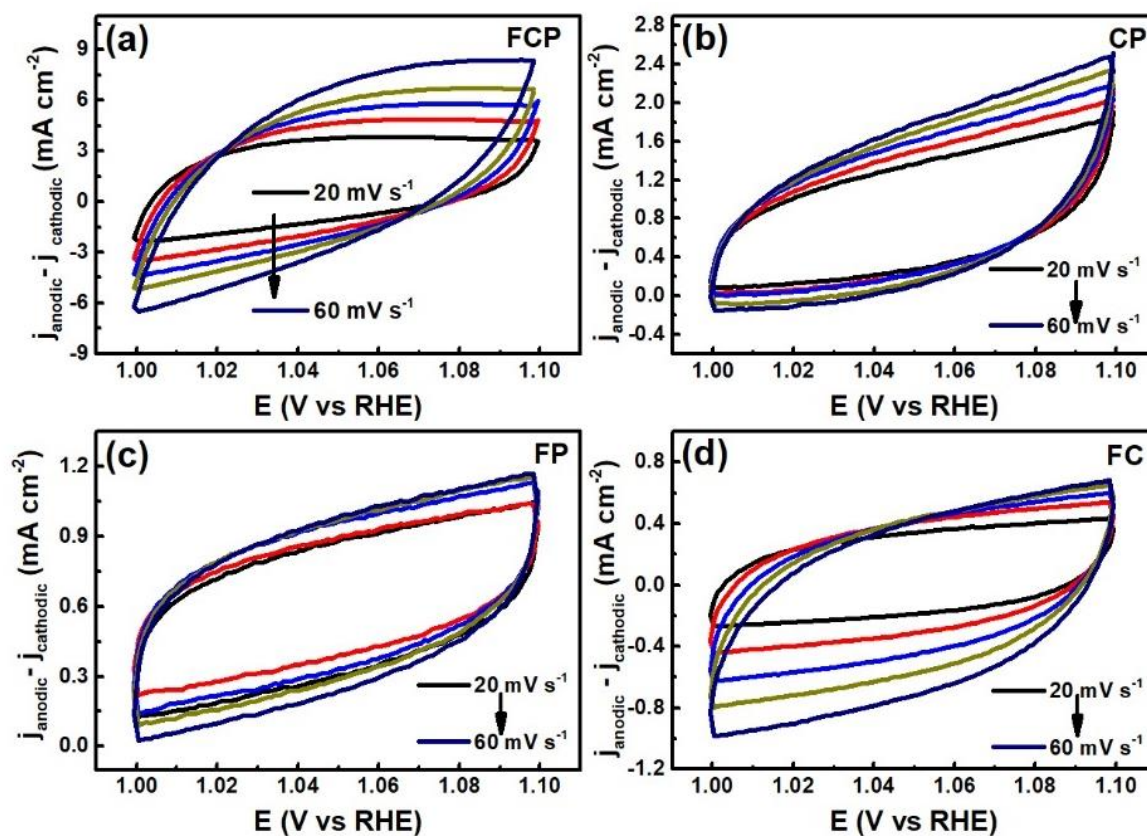

**Fig. S16.** CV curves at different scan rates in non-faradaic potential region in 1.0 M KOH for (a) FCP, (b) CP, (c) FP and (d) FC samples.

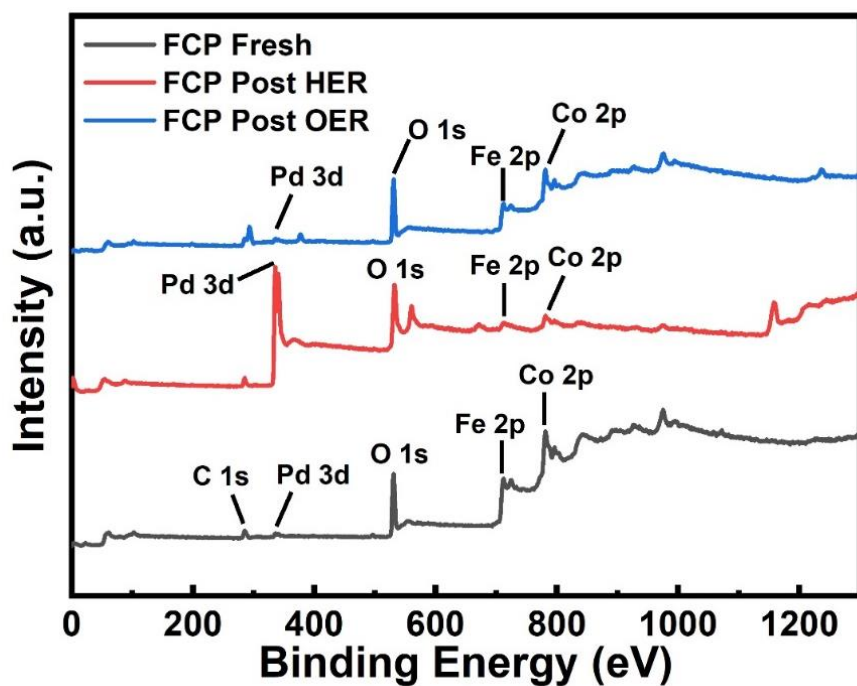

**Fig. S17.** Wide scan XPS spectrum of Fresh FCP, FCP Post HER and FCP Post OER samples.

**Table S6.** Elemental concentration (%) analysed by ICP-MS before and after the stability tests.

| Sample Name  | Sample wt. (g) | Volume makeup (mL) | Conc. (g/L) | Fe Conc. ( $\mu\text{g/g}$ ) | Co Conc. ( $\mu\text{g/g}$ ) | Pd Conc. ( $\mu\text{g/g}$ ) |
|--------------|----------------|--------------------|-------------|------------------------------|------------------------------|------------------------------|
| FCP          | 0.0974         | 40                 | 2.435       | 150826.28                    | 169220.12                    | 166128.13                    |
| FCP Post HER | 0.0971         | 40                 | 2.4275      | 157312.04                    | 172381.05                    | 167335.94                    |
| FCP Post OER | 0.0974         | 40                 | 2.435       | 145282.54                    | 170673.10                    | 170030.80                    |

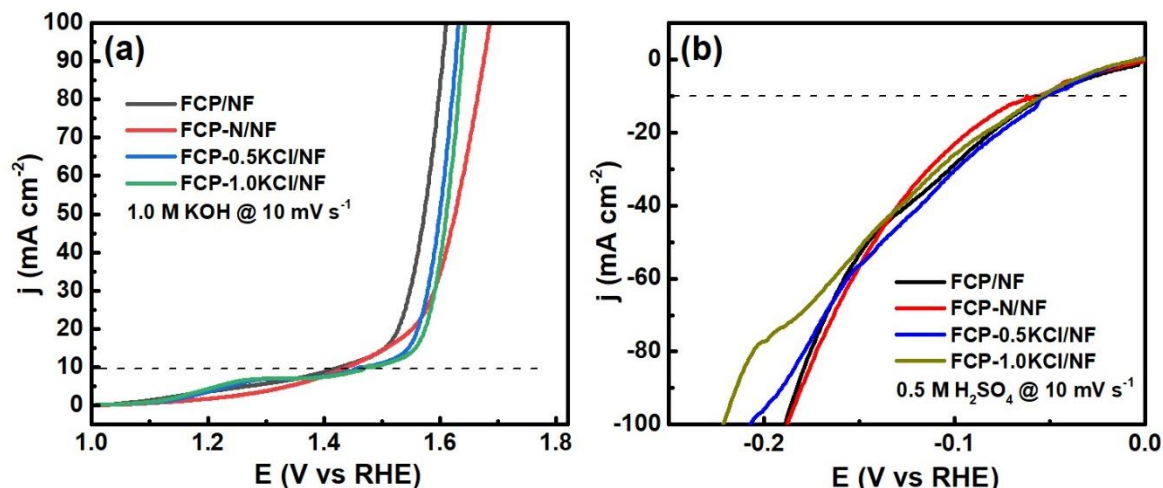

**Fig. S18.** (a) OER and (b) HER LSV polarisation curves of different contents of the chlorine in FCP sample.

**Table S7** Adsorption free energy  $H(\Delta G(H^*))$  of (in eV) for bimetallic and trimetallic alloys.

| Structure | $\Delta G(H^*)$ |
|-----------|-----------------|
| FP        | 0.38            |
| FC        | 1.21            |
| CP        | 0.29            |
| FCP       | -0.08           |

## References.

1. Gaussian 16, Revision B.01, M. J. Frisch, G. W. Trucks, H. B. Schlegel, G. E. Scuseria, M. A. Robb, J. R. Cheeseman, G. Scalmani, V. Barone, G. A. Petersson, H. Nakatsuji, X. Li, M. Caricato, A. V. Marenich, J. Bloino, B. G. Janesko, R. Gomperts, B. Mennucci, H. P. Hratchian, J. V. Ortiz, A. F. Izmaylov, J. L. Sonnenberg, D. Williams-Young, F. Ding, F. Lipparini, F. Egidi, J. Goings, B. Peng, A. Petrone, T. Henderson, D. Ranasinghe, V. G. Zakrzewski, J. Gao, N. Rega, G. Zheng, W. Liang, M. Hada, M. Ehara, K. Toyota, R. Fukuda, J. Hasegawa, M. Ishida, T. Nakajima, Y. Honda, O. Kitao,

- H. Nakai, T. Vreven, K. Throssell, J. A. Montgomery, Jr., J. E. Peralta, F. Ogliaro, M. J. Bearpark, J. J. Heyd, E. N. Brothers, K. N. Kudin, V. N. Staroverov, T. A. Keith, R. Kobayashi, J. Normand, K. Raghavachari, A. P. Rendell, J. C. Burant, S. S. Iyengar, J. Tomasi, M. Cossi, J. M. Millam, M. Klene, C. Adamo, R. Cammi, J. W. Ochterski, R. L. Martin, K. Morokuma, O. Farkas, J. B. Foresman, and D. J. Fox, Gaussian, Inc., Wallingford CT, 2016.
2. P. Kush, K. Deori, A. Kumar and S. Deka, *J. Mater. Chem. A*, 2015, **3**, 8098-8106.
  3. M. Chauhan, K. P. Reddy, C. Gopinath and S. Deka, *ACS Catal.*, 2017, **7**, 5871-5879.
  4. H. Han, Y. R. Hong, J. Woo, S. Mhin, K. M. Kim, J. Kwon, H. Choi, Y. C. Chung and T. Song, *Adv. Energy Mater.*, 2019, **9**, 1803799.
  5. X. Li, X. Lv, X. Sun, C. Yang, Y. Z. Zheng, L. Yang, S. Li and X. Tao, *Appl. Catal. B*, 2021, **284**, 119708.
  6. X. Shang, K. L. Yan, Y. Rao, B. Dong, J. Q. Chi, Y. R. Liu, X. Li, Y. M. Chai and C. G. Liu, *Nanoscale*, 2017, **9**, 12353-12363.
  7. F. Urbain, V. Smirnov, J. P. Becker, A. Lambertz, F. Yang, J. Ziegler, B. Kaiser, W. Jaegermann, U. Rau and F. Finger, *Energy Environ. Sci.*, 2016, **9**, 145-154.

\*\*\*\*\*
